# Supplementary material for: Electroencephalography and Right Ventricular Dysfunction in Neonates undergoing Therapeutic Hypothermia for Hypoxic Ischemic Encephalopathy
Source: Research Square preprint supplement (doi:10.21203/rs.3.rs-7738018/v1), 2025-10-15
Supplement: Supplementary file 1 [file 0ac5b36493200cb304a8ab94.docx]

**Table 2: Echocardiography measures of patients normal and abnormal cEEG & normal and abnormal aEEG.**

|  | **Abnormal cEEG (n=36)** | **Normal cEEG (n=11)** | **p-value** | **Abnormal aEEG (n=11)** | **Normal aEEG (n=6)** | **p-value** |
| --- | --- | --- | --- | --- | --- | --- |
| Age at TNE (hours) | 10 [6;14] | 10 [3,12] | 0.76 | 10.5 [4.5,16] | 11 [7.4, 43] | 0.26 |
| **RV function parameters** | | | | | | |
| Tricuspid annular plane systolic excursion (mm) | 7.7 ± 2.5 | 8.6 ± 2.1 | 0.48 | 7.1 ± 1.8 | 8.5 ± 1.4 | 0.29 |
| Fractional area change (%) | 36 ± 1 | 35 ± 1 | 0.79 | 32 ± 1.3 | 39 ± 0.2 | 0.009 |
| Right ventricular output (mls/min/kg) | 65 ± 19 | 111 ± 16 | 0.47 | 82 ± 31 | 94 ± 37 | 0.66 |
| Left ventricular output (mls/min/kg) | 106 ± 34 | 90 ± 27 | 0.11 | 86 ± 30 | 115 ± 32 | 0.61 |
| **Pulmonary vascular markers** | | | | | | |
| Pulmonary artery acceleration time (msec) | 53 ± 24 | 43 ± 6 | 0.05 | 42 ± 12 | 65 ± 25 | 0.09 |
| Ratio of right ventricular to pulmonary artery acceleration time | 5.1 ± 1.8 | 4.7 ± 0.9 | 0.06 | 5.3 ± 1.5 | 3.8 ± 1.1 | 0.52 |
| Systolic eccentricity index | 1.35 ± 0.23 | 1.27 ±0.18 | 0.48 | 1.5 ± 0.17 | 1.4 ± 0.25 | 0.69 |
| **Shunting** | | | | | | |
| PDA present  Left to right shunting  Bidirectional  Right to left shunting | 24/34  10/34  0 | 6/10  4/10  0 | 0.62 | 4/10  6/10  0 | 3/4  1/4  0 | 0.56 |
| ASD/PFO present  Left to right shunting  Bidirectional  Right to left shunting | 18/34  14/34  2/34 | 9/11  2/11  0 | 0.22 | 6/10  4/10  0 | 4/5  1/5  0 | 0.60 |
| VSD present | 0 | 0 | n/a | 0 | 0 | n/a |

cEEG: continuous electroencephalography; aEEG: amplitude-integrated electroencephalography; TNE: targeted neonatal echocardiography; PDA: patent ductus arteriosus; ASD: atrial septal defect; PFO: patent foramen ovale; VSD: ventricular septal defect
