# Supplementary material for: Electroencephalography and Right Ventricular Dysfunction in Neonates undergoing Therapeutic Hypothermia for Hypoxic Ischemic Encephalopathy
Source: Research Square preprint supplement (doi:10.21203/rs.3.rs-7738018/v1), 2025-10-15
Supplement: Supplementary file 2 [file eede809e4a11ab36ae6159f2.docx]

**Table 1: Clinical characteristics of patients with and without abnormal cEEG & with and without abnormal aEEG**

|  | **Abnormal cEEG (n=36)** | **Normal cEEG (n=11)** | **p-value** | **Abnormal aEEG (n=11)** | **Normal aEEG (n=6)** | **p-value** |
| --- | --- | --- | --- | --- | --- | --- |
| **Demographic Characteristics** | | | | | | |
| Gestational age (weeks) | 38.4 ± 1.6 | 39 ± 1.8 | 0.94 | 38.4 ± 1.3 | 38.9 ± 2.7 | 0.02 |
| Birthweight (grams) | 3378 ± 598 | 3451 ± 690 | 0.43 | 3398 ± 747 | 3269 ± 445 | 0.22 |
| Female (n) | 17 (47) | 1 (9) | 0.02 | 5 (45) | 3 (50) | 0.623 |
| Race  - White  - Black/African American  - More than one race  - Unknown | 22 (61)  5 (14)  8 (22)  1 (3) | 5 (46)  4 (36)  2 (18)  0 | 0.40 | 7 (64)  0  3 (27)  0 | 3 (50)  1 (17)  2 (33)  0 | 0.47 |
| Ethnicity  - Hispanic or latinx  - Not Hispanic or Latinx  - Unknown | 2 (6)  32 (88)  2 (6) | 1 (9)  10 (91)  0 | 0.68 | 0  9 (82)  2 (18) | 2 (33)  4 (67)  0 | 0.09 |
| Gestational size  - Small for gestation  - Appropriate for gestation  - Large for gestation | 2 (6)  28 (77)  6 (17) | 1 (9)  8 (73)  2 (18) | 0.90 | 1 (9)  8 (73)  2 (18) | 0  5 (83)  1 (17) | 0.74 |
| Birth head circumference (cm) | 34.7 ± 1.9 | 35.0 ± 1.6 | 0.79 | 34.3 ± 1.6 | 34.7 ± 1.3 | 0.60 |
| 5-minute Apgar | 4 [2,6] | 5 [4, 7] | 0.22 | 5 [4,7] | 6 [5, 7] | 0.78 |
| Time to goal temperature 33.5 C (hours) | 5.6 [3.7,7.8] | 3.5 [3,6.2] | 0.49 | 3.7 [3,7.5] | 6 [5.2,13] | 0.60 |
| **Delivery Characteristics** | | | | | | |
| Vaginal delivery (n) | 15 (42) | 4 (36) | 0.75 | 4 (36) | 2 (33) | 0.66 |
| Rupture of membranes duration (hours) | 9 [0, 14] | 11 [3, 19] | 0.75 | 0 [0, 16] | 12 [2.25, 21] | 0.85 |
| Meconium-stained amniotic fluid | 14 (39) | 3 (27) | 0.52 | 3 (27) | 2 (33) | 0.60 |
| **Respiratory Support** | | | | | | |
| Mean airway pressure (cmH2O) | 6.9 [1.25, 8.9] | 6 [5, 9.7] | 0.57 | 5 [5.1, 8.6] | 2.5 [0, 7.23] | 0.27 |
| Fraction of inspired oxygen (FiO2) | 0.325 [0.21, 0.81] | 0.30 [0.23, 0.60] | 0.43 | 0.21 [0.21, 0.60] | 0.21 [0.21, 0.625] | 0.96 |
| Respiratory severity score | 1.8 [0,4.5] | 2.4 [1.29, 5.2] | 0.94 | 2.5 [1.2, 8.3] | 0 [0, 7.5] | 0.94 |
| First pH | 7.07 ± 0.18 | 7.14 ± 0.12 | 0.13 | 7.11 ± 0.15 | 7.23 ± 0.06 | 0.08 |
| First pCO2 | 61 ± 29 | 49 ± 13 | 0.02 | 62 ± 22 | 47 ± 7.4 | 0.10 |
| First base | -12 ± 6 | -12 ± 5 | 0.12 | -8.7 ± 5.7 | -8 ± 3.7 | 0.28 |
| **Cardiovascular Illness Severity** | | | | | | |
| SNAPPE-II score | 38 ± 13 | 35 ± 11 | 0.54 | 42 ± 17 | 29 ± 8 | 0.15 |
| Inhaled nitric oxide | 4 (11) | 1 (9) | 1 | 0 | 1 (17) | 0.35 |
| Treated with CV agent at time of TnECHO  -Dobut  -Epi  -Dobut & Epi  -Epi & Vaso  -NE, epi & vaso  -Dop, dobut, epi & vaso | 14 (39)  7  2  1  2  1  1 | 1 (17)  1  0  0  0  0  0 | 0.06 | 3 (27)  2  1  0  0  0  0 | 0  0  0  0  0  0  0 | 0.51 |
| Vasopressor/Inotrope score at TnECHO | 0.1 [0, 5] | 0 [0, 0] | 0.23 | 0 [0, 3] | 0 [0,0] | 0.19 |
| Maximal CV agent  -Dobut  -Epi  -NE  -Dobut & Epi  -Epi & Vaso  -NE, epi & vaso  -Dop, dobut, epi & vaso | 17 (47)  8  2  1  3  1  1  1 | 3 (27)  3  0  0  0  0  0  0 | 0.21 | 8 (73)  5  2  1  0  0  0  0 | 0  0  0  0  0  0  0  0 | 0.007 |
| Peak vasopressor/inotrope score | 0 [0,3] | 0 [0,2.5] | 0.15 | 3 [0, 13] | 0 [0,0] | 0.11 |
| Lactate at 6h of age (mmol/l) | 7.9 ± 6.3 | 7.8 ± 3.34 | 0.03 | 6.9 ± 4.8 | 4.1 ± 2.4 | 0.16 |
| Lactate at 12h of age (mmol/l) | 7.3 ± 5.6 | 7.5 ± 2.9 | 0.10 | 6.8 ± 3.5 | 5.0 ± 3.4 | 0.83 |
| Lactate at 24h of age (mmol/l) | 5.6 ± 5.2 | 3.8 ± 1.7 | 0.05 | 5.6 ± 2.9 | 2.9 ± 1.2 | 0.17 |
| Heart rate | 119 ± 16 | 125 ± 27 | 0.01 | 121 ± 22 | 113 ± 17 | 0.81 |
| Systolic arterial pressure (mmHg) | 69 ± 16 | 68 ± 11 | 0.14 | 67 ± 13 | 76 ± 20 | 0.19 |
| Diastolic arterial pressure (mmHg) | 44 ± 10 | 48 ± 22 | 0.66 | 41 ± 13 | 53 ± 20 | 0.40 |
| **Somatic End-Organ Markers** | | | | | | |
| High sensitivity troponin T (ng/L) | 180 [80, 393] | 233 [140, 396] | 0.30 | 233 [114, 401] | 153 [5.5, 177] | 0.22 |
| Creatinine (mg/dL) | 1 [0.8, 1.2] | 1 [0.8, 1.2] | 0.39 | 1 [1, 1.2] | 1.1 [0.88, 1.13] | 0.35 |
| Alanine aminotransferase (U/L) | 32 [15, 117] | 48 [21, 126] | 0.45 | 40 [21, 126] | 20 [9.8, 52.25] | 0.45 |
| Total bilirubin (mg/dL) | 1.9 [1.3, 3.9] | 2.7 [0.9, 3.0] | 0.52 | 1.9 [1.6, 3] | 2.3 [0.75, 3.6] | 0.53 |

cEEG: continuous electroencephalography; aEEG: amplitude-integrated electroencephalography; Respiratory severity score = mean airway pressure x FiO2; SNAPPE-II: Score for Neonatal Acute Physiology with Perinatal Extension-II CV: cardiovascular; Dobut: dobutamine; Dop: dopamine; NE: norepinephrine; Epi: epinephrine; Vaso: vasopressin
